# Supplementary material for: An inter-laboratory comparison of aerosol in organic ion measurements by Ion Chromatography: implications for aerosol pH estimate
Source: Copernicus journal article supplement (doi:10.5194/amt-2020-156), 2020-05-04
Supplement: Supplementary file [file amt-2020-156-manuscript-revision- supplemental information.pdf › amt-2020-156-manuscript-revision- supplemental information.pdf]

## **SUPPLEMENTARY INFORMATION**

### **An inter-laboratory comparison of aerosol inorganic ion measurements by Ion Chromatography: implications for estimation of aerosol pH**

Jingsha Xu, Shaojie Song, Roy M. Harrison, Congbo Song, Lianfang Wei, Qiang Zhang, Yele Sun, Lu Lei, Chao Zhang, Xiaohong Yao, Dihui Chen, Weijun Li, Miaomiao Wu, Hezhong Tian, Lining Luo, Shengrui Tong, Weiran Li, Junling Wang, Guoliang Shi, Yanqi Huangfu, Yingze Tian, Baozhu Ge, Shaoli Su<sup>1</sup>, Chao Peng, Yang Chen, Fumo Yang, Aleksandra Mihajlidi-Zelić, Dragana Đorđević, Stefan J. Swift, Imogen Andrews, Jacqueline F. Hamilton, Ye Sun, Agung Kramawijaya, Jinxiu Han, Supattarachai Saksakulkrai, Clarissa Baldo, Siqi Hou, Feixue Zheng, Kaspar R. Daellenbach, Chao Yan, Yongchun Liu, Markku Kulmala, Pingqing Fu, Zongbo Shi\*

Correspondence to:

Dr Zongbo Shi, email: [Z.Shi@bham.ac.uk](mailto:Z.Shi@bham.ac.uk)

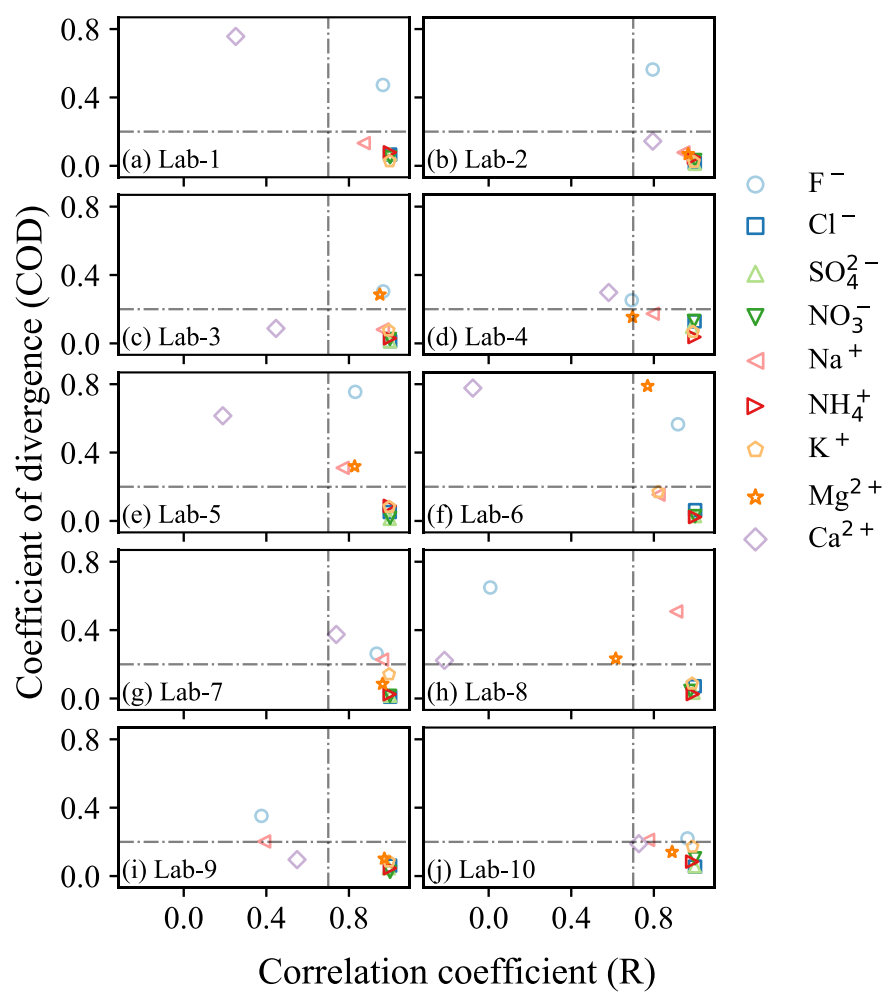

Fig. S1 Coefficient of divergence (COD) plotted against correlation coefficient (R) for all ions in each lab with the mean ionic concentrations of 10 labs. (Note: vertical line indicates an R value of 0.8, and horizontal lines indicate COD values of 0.2.)

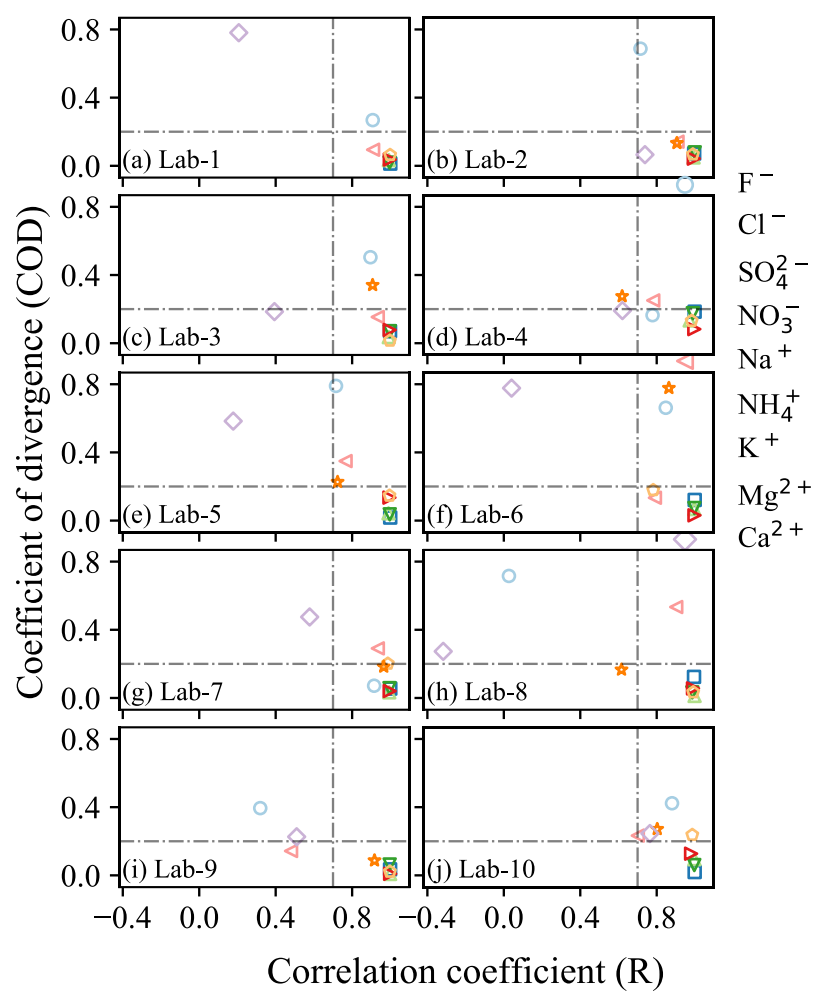

Fig. S2 Coefficient of divergence (COD) plotted against correlation coefficient (R) for all ions in each lab with the upper values (84% percentile) of ionic concentrations of 10 labs. (Note: vertical line indicates an R value of 0.8, and horizontal lines indicate COD values of 0.2.)

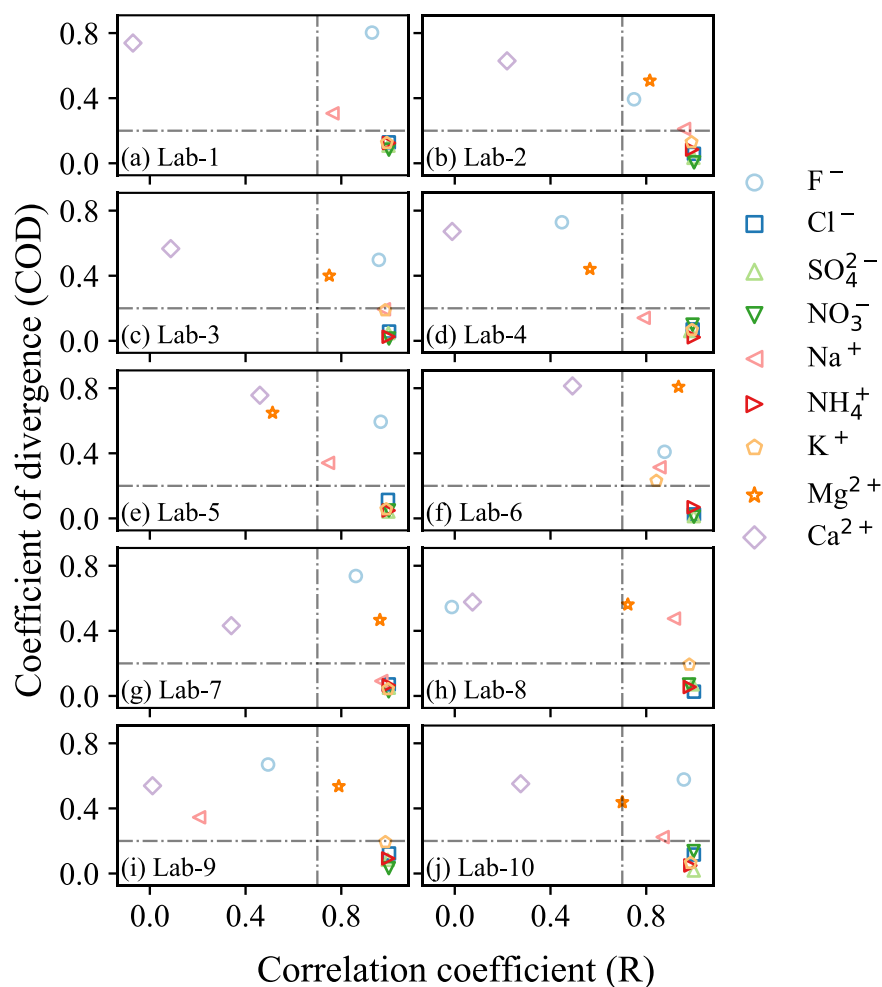

Fig. S3 Coefficient of divergence (COD) plotted against correlation coefficient (R) for all ions in each lab with the lower values (16% percentile) of 10 labs. (Note: vertical line indicates an R value of 0.8, and horizontal lines indicate COD values of 0.2.)

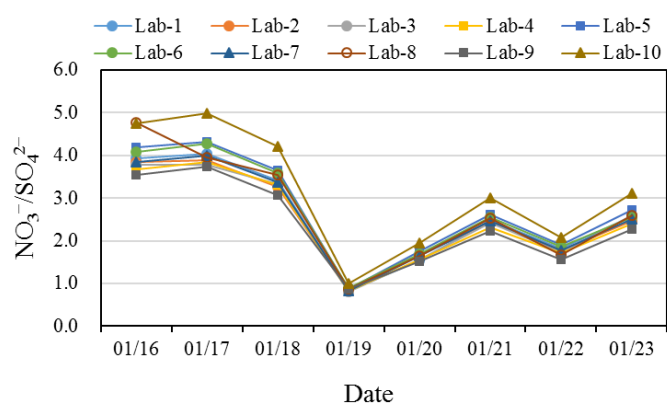

Fig. S4 Mass ratio of  $\text{NO}_3^-/\text{SO}_4^{2-}$  during the study period in 10 labs.

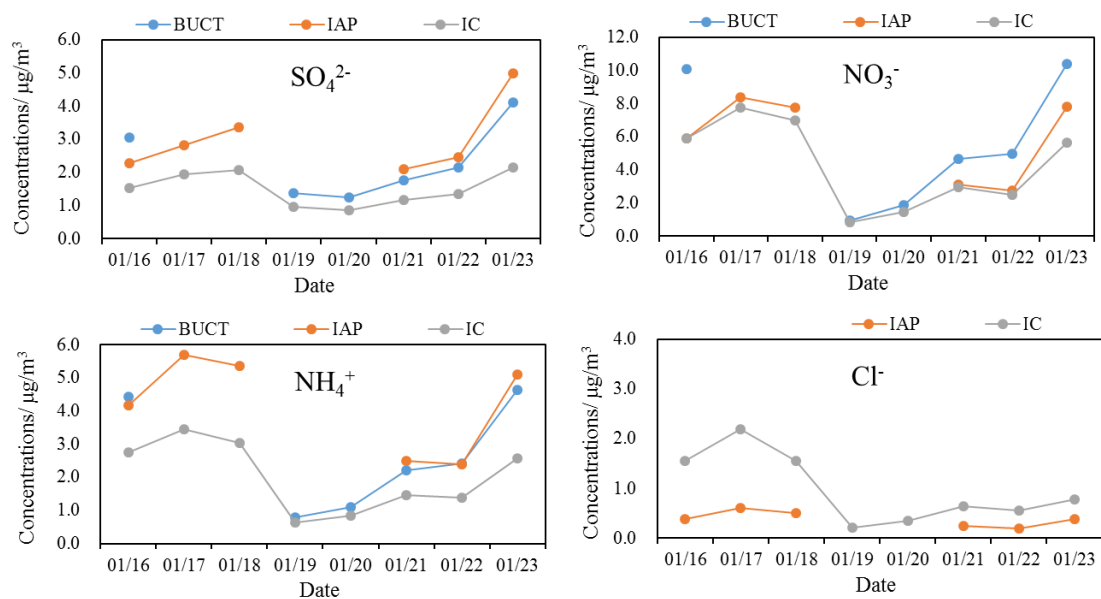

Fig. S5 Time series of ion species measured by IC (median values measured by 10 labs) in this study and ACSM at IAP and BUCT

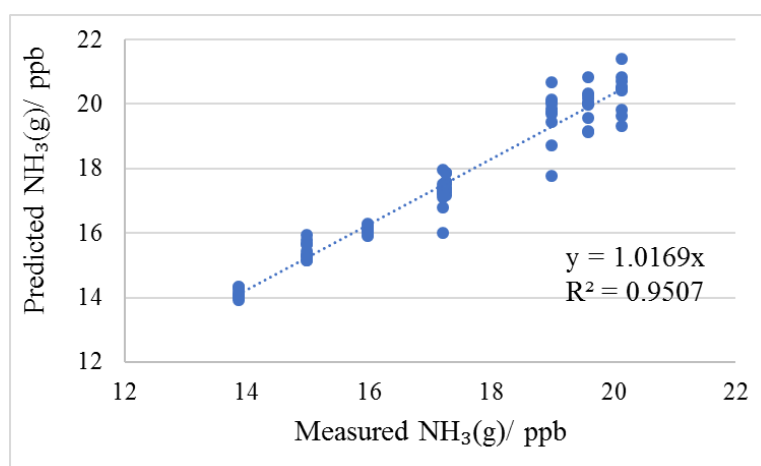

Fig. S6 The correlation between predicted and measured gas-phase  $\text{NH}_3$

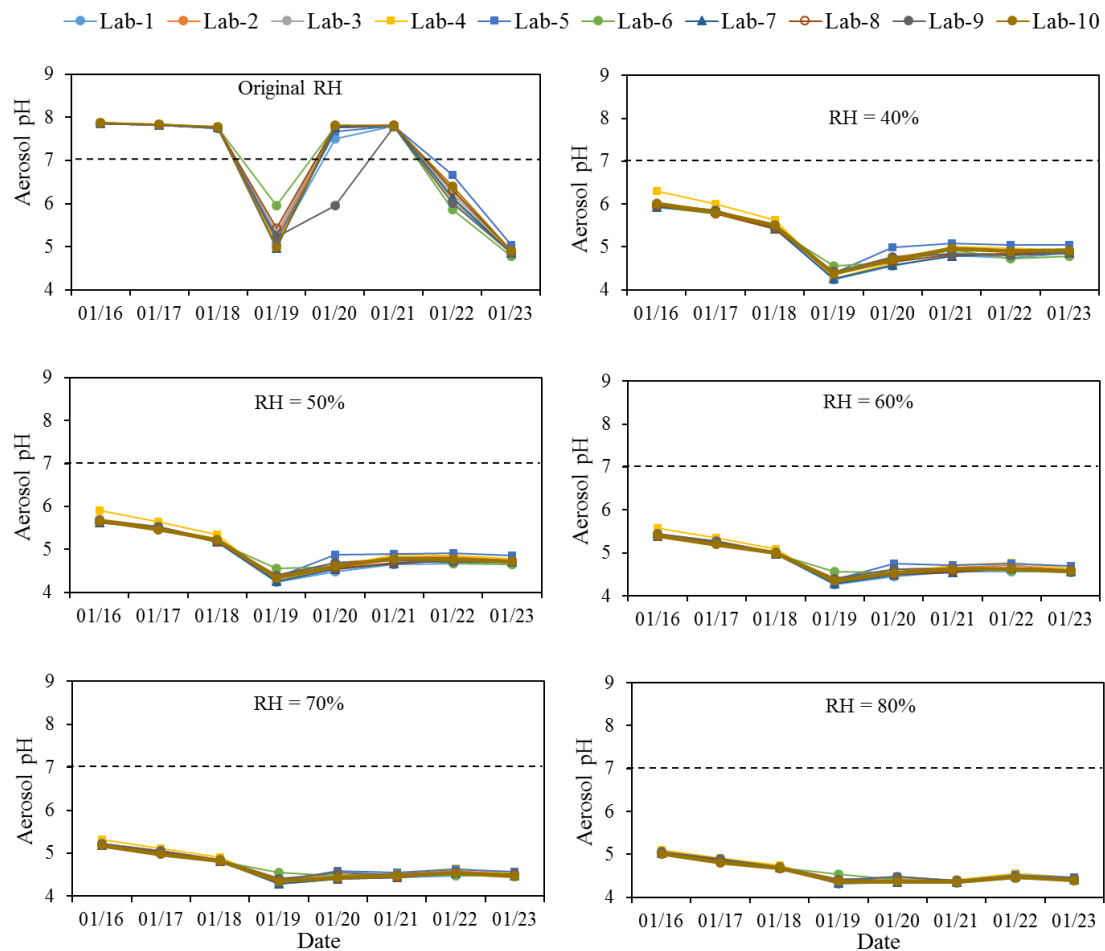

Fig. S7 Aerosol pH estimated by ISORROPIA-II at different RH for all samples

Table S1 Summary of extraction details in 10 laboratories.

| Lab NO. | Extraction vial type                                            | Ultrapure water purity & generator model        | Ultrasonicator model & power                    | Syringe type                                                                       | Syringe filter type                                                       | Vial type (used for cation & anion analysis)                                    |
|---------|-----------------------------------------------------------------|-------------------------------------------------|-------------------------------------------------|------------------------------------------------------------------------------------|---------------------------------------------------------------------------|---------------------------------------------------------------------------------|
| 1       | Nalgene high density polyethylene bottle                        | 18.2 MΩ cm & Millipore, USA                     | KQ5200DE & 600 W                                | Disposable polypropylene syringe                                                   | 0.22 μm PTFE                                                              | Dionex 5 ml PolyVials                                                           |
| 2       | Nalgene Wide-Mouth Straight-Sided PPCO Jars with Closure, 250mL | 18.2 M Ω .cm & UNIQUE-R20                       | KQ-300B & 300W                                  | 10mL disposable polypropylene syringe                                              | Acrodisc® 25 mm syringe filter, 0.45 μm supor® Membrane, Pall corporation | 15mL conical centrifuge tubes, Watson®                                          |
| 3       | -                                                               | 18.2 MΩ .cm & Elix Essential                    | -                                               | -                                                                                  | -                                                                         | 5mL Thermo PolyVials                                                            |
| 4       | 50ml centrifuge tube (Jiang su, Haimen)                         | 18.2 MΩ cm & Millipore, USA.                    | KQ5200DE & 200W                                 | Disposable polypropylene syringe (Shanghai, Yuzhi)                                 | 0.45 μm syringe filter (Tianjin, Jinteng)                                 | 10ml centrifuge tube                                                            |
| 5       | Centrifuge tube 50mL                                            | 18.2 MΩ cm & Model: DURA FV                     | KQ-100DB & 100W                                 | Disposable sterile syringe 1mL                                                     | 0.22 μ m, 13 mm Agela technologies                                        | PP-11ml (Model: 6.2743.050)                                                     |
| 6       | CNW Technologies GmbH                                           | 18.2 MΩ cm & Elix Essential 15                  | GT SONIC-D27 & 500W                             | 5ml disposable polypropylene syringe                                               | 0.2 μm PTFE                                                               | PP-11ml                                                                         |
| 7       | 50 mL Centrifuge Tube                                           | 18.2 MΩ cm & A3S-10-10-BE                       | KQ-500E & 500W                                  | 20 mL disposable sterile syringe                                                   | Labfic 13 mm PES Syringe Filter 0.45 μm with Outer Ring                   | 25 mL glass vial                                                                |
| 8       | Glass Vials                                                     | 18.2 MΩ cm & ELGA PURELAB Option / ELGA Classic | Bandelin Sonorex super RK 100H & 35 kHz, 80 W   | Disposable medical polypropylene syringe (Romed Holland Van Oostveen Medical B.V.) | 0.2 μm Agilent Nylon syringe filter                                       | Dionex PolyVials supplied with 20 μm filter caps                                |
| 9       | 15 ml Sarstedt Vials                                            | 18.2 MΩ cm & SUEZ                               | Fisher Scientific model FB 15051 & 37 kHz, 80 W | 5ml disposable polypropylene syringe                                               | Milex Syringe Filter 0.22 μm Pore Size                                    | Thermo Scientific 0.5ml PolyVials                                               |
| 10      | 15 mL Centrifuge Tube                                           | 18.2 MΩ cm & Millipore, USA                     | MRC DCF-120H & 65 kHz, 100 W                    | Disposable polypropylene syringe (10 ml)                                           | ACRODISC Syringe Filter 0.22 μm Pore Size                                 | Chromatography Direct 1.5ml PolyVials (cations); Dionex 5 ml PolyVials (anions) |

Table S2 Summary of calibration (calibration range: mg/L (R<sup>2</sup>)) and QA/QC details in 10 laboratories.

| Lab NO. | F <sup>-</sup>          | Cl <sup>-</sup>       | SO <sub>4</sub> <sup>2-</sup> | NO <sub>3</sub> <sup>-</sup> | Na <sup>+</sup>     | NH <sub>4</sub> <sup>+</sup>    | K <sup>+</sup>       | Mg <sup>2+</sup>      | Ca <sup>2+</sup>    | QA/QC                                                                                                                                                                                       |
|---------|-------------------------|-----------------------|-------------------------------|------------------------------|---------------------|---------------------------------|----------------------|-----------------------|---------------------|---------------------------------------------------------------------------------------------------------------------------------------------------------------------------------------------|
| 1       | 0.05~5<br>(>0.999)      | 0.05~5<br>(>0.999)    | 0.3~30<br>(>0.999)            | 0.3~30<br>(>0.999)           | 0.05~10<br>(>0.999) | 0.05~10<br>(>0.999)             | 0.05~10<br>(>0.999)  | 0.05~10<br>(>0.999)   | 0.05~10<br>(>0.999) | 3 water blanks were run before analysis; Quality control (QC) samples were run every 10 samples;                                                                                            |
| 2       | 0.048~2.4<br>(0.999)    | 0.072~3.6<br>(>0.999) | 0.36~36<br>(0.999)            | 0.24~24<br>(>0.999)          | 0.04~8<br>(0.998)   | 0.08~16<br>(0.997; non-linear)  | 0.04~2<br>(>0.999)   | 0.04~2<br>(0.997)     | 0.2~10<br>(0.995)   | 3 water blanks were run before analysis;                                                                                                                                                    |
| 3       | 0.002~5<br>(>0.999)     | 0.04~100<br>(0.999)   | 0.04~100<br>(0.999)           | 0.02~50<br>(0.999)           | 0.05~20<br>(0.999)  | 0.05~20<br>(>0.999; non-linear) | 0.05~20<br>(0.999)   | 0.05~20<br>(0.999)    | 0.05~20<br>(0.998)  | 3 water blanks were run before analysis;                                                                                                                                                    |
| 4       | 0.1~10<br>(>0.999)      | 0.4~40<br>(>0.999)    | 0.4~40<br>(>0.999)            | 0.3~30<br>(>0.999)           | 0.1~5<br>(>0.999)   | 0.5~25<br>(>0.999)              | 0.1~5<br>(>0.999)    | 0.1~5<br>(>0.999)     | 0.1~5<br>(>0.999)   | 3 water blanks were run before analysis;                                                                                                                                                    |
| 5       | 0.05~0.8<br>(0.997)     | 0.3~2.4<br>(>0.999)   | 1.5~12<br>(>0.999)            | 1~8<br>(>0.999)              | 0.2~3.2<br>(0.999)  | 0.4~6.4<br>(0.997)              | 0.2~3.2<br>(0.998)   | 0.2~3.2<br>(0.997)    | 1~16<br>(0.998)     | 3 water blanks were run before analysis;                                                                                                                                                    |
| 6       | 0.1~2<br>(>0.999)       | 1~20<br>(>0.999)      | 2~40<br>(>0.999)              | 1~20<br>(>0.999)             | 0.5~10<br>(>0.999)  | 0.1~2<br>(>0.999)               | 0.5~10<br>(>0.999)   | 0.5~10<br>(>0.999)    | 2~40<br>(>0.999)    | 3 water blanks were run before analysis; Quality control (QC) samples were run every 10 samples;                                                                                            |
| 7       | 0.005~0.2<br>(0.998)    | 0.02~0.8<br>(>0.999)  | 0.2~8<br>(0.999)              | 0.1~4<br>(>0.999)            | 0.5~2<br>(>0.999)   | 0.2~8<br>(0.999)                | 0.02~0.8<br>(>0.999) | 0.01~0.4<br>(>0.999)  | 0.05~2<br>(0.999)   | 3 water blanks were run before analysis; Standards were prepared from dilution of certified standard solutions;                                                                             |
| 8       | 0.0032~0.125<br>(0.999) | 0.08~4<br>(>0.999)    | 0.16~8<br>(>0.999)            | 0.16~8<br>(>0.999)           | 0.04~1.6<br>(0.997) | 0.2~8<br>(>0.999; non-linear)   | 0.04~1.6<br>(0.998)  | 0.016~0.8<br>(>0.999) | 0.08~4<br>(>0.999)  | 3 water blanks were run before analysis; Standards were prepared from dilution of certified standard solutions; Quality control (QC) samples were run at the beginning and end of analysis; |
| 9       | 0.01~25<br>(>0.999)     | 0.01~25<br>(0.999)    | 0.01~25<br>(>0.999)           | 0.01~25<br>(0.998)           | 0.01~25<br>(>0.999) | 0.01~25<br>(>0.999)             | 0.01~25<br>(>0.999)  | 0.01~25<br>(>0.999)   | 0.01~25<br>(>0.999) | 3 water blanks were run before analysis; Standards were prepared from single standard with purity considered for correction; Quality control (QC) samples were run after every 4 samples;   |
| 10      | 0.05~5<br>(>0.999)      | 0.05~5<br>(>0.999)    | 0.05~5<br>(>0.999)            | 0.05~5<br>(>0.999)           | 0.01~5<br>(>0.999)  | 0.01~5<br>(0.996)               | 0.01~5<br>(>0.999)   | 0.01~5<br>(>0.999)    | 0.01~5<br>(0.998)   | 3 water blanks were run before analysis; Standards were prepared from single standard with purity considered; Quality control (QC) samples were run at the beginning and end of analysis;   |



Table S3 Temperature (T), relative humidity (RH) and gas-phase NH<sub>3</sub> concentrations during the study period

| Date      | T/°C | RH/% | NH <sub>3</sub> /ppb |
|-----------|------|------|----------------------|
| 2019/1/16 | -4.4 | 23.8 | 20.1                 |
| 2019/1/17 | -1.8 | 21.9 | 19.0                 |
| 2019/1/18 | 0.6  | 21.0 | 19.6                 |
| 2019/1/19 | 1.2  | 21.7 | 16.0                 |
| 2019/1/20 | 2.5  | 14.3 | 13.9                 |
| 2019/1/21 | 4.3  | 13.8 | 15.0                 |
| 2019/1/22 | 2.8  | 22.7 | 17.3                 |
| 2019/1/23 | 2.9  | 40.1 | 17.2                 |

Table S4 Uncorrected and CRM-corrected ion concentrations (µg/m<sup>3</sup>) and their corresponding coefficient of variations (CV/ %)

|           | Uncorrected    |      | Corrected      |      | Uncorrected    |      | Corrected      |      |
|-----------|----------------|------|----------------|------|----------------|------|----------------|------|
|           | Mean (min-max) | CV/% | Mean (min-max) | CV/% | Mean (min-max) | CV/% | Mean (min-max) | CV/% |
|           | Chloride       |      |                |      | Sulfate        |      |                |      |
| 2019/1/16 | 1.5 (1.2-1.8)  | 11.0 | 1.5 (1.2-1.7)  | 10.5 | 1.5 (1.1-1.7)  | 10.7 | 1.5 (1.2-1.7)  | 11.7 |
| 2019/1/17 | 2.2 (1.8-2.6)  | 11.7 | 2.2 (1.7-2.6)  | 11.1 | 2.0 (1.6-2.3)  | 9.1  | 2.0 (1.5-2.2)  | 10.6 |
| 2019/1/18 | 1.5 (1.2-1.8)  | 11.3 | 1.5 (1.2-1.8)  | 11.2 | 2.0 (1.6-2.4)  | 9.6  | 2.0 (1.6-2.3)  | 11.0 |
| 2019/1/19 | 0.2 (0.1-0.3)  | 18.2 | 0.2 (0.2-0.2)  | 16.1 | 1.0 (0.9-1.1)  | 7.5  | 1.0 (0.8-1.1)  | 9.0  |
| 2019/1/20 | 0.3 (0.2-0.4)  | 18.0 | 0.3 (0.3-0.4)  | 16.8 | 0.9 (0.8-1.1)  | 10.1 | 0.9 (0.7-1.0)  | 10.8 |
| 2019/1/21 | 0.6 (0.5-0.8)  | 11.9 | 0.6 (0.5-0.7)  | 11.0 | 1.2 (1.1-1.4)  | 8.3  | 1.2 (0.9-1.3)  | 8.9  |
| 2019/1/22 | 0.5 (0.4-0.7)  | 12.6 | 0.5 (0.4-0.6)  | 11.2 | 1.4 (1.0-1.6)  | 11.8 | 1.4 (1.0-1.6)  | 12.2 |
| 2019/1/23 | 0.8 (0.5-0.9)  | 13.1 | 0.7 (0.6-0.8)  | 11.7 | 2.2 (1.7-2.5)  | 11.0 | 2.2 (1.6-2.4)  | 12.6 |
| Average   |                | 13.5 |                | 12.4 |                | 9.8  |                | 10.9 |
|           | Ammonium       |      |                |      |                |      |                |      |
| 2019/1/16 | 2.7 (2.1-3.2)  | 12.0 | 2.6 (2.0-3.2)  | 15.2 |                |      |                |      |
| 2019/1/17 | 3.6 (2.6-4.5)  | 14.3 | 3.5 (2.5-4.2)  | 15.6 |                |      |                |      |
| 2019/1/18 | 3.1 (2.7-3.8)  | 10.3 | 3.1 (2.2-3.8)  | 13.8 |                |      |                |      |
| 2019/1/19 | 0.6 (0.5-0.8)  | 11.5 | 0.6 (0.5-0.7)  | 10.6 |                |      |                |      |
| 2019/1/20 | 0.9 (0.6-1.0)  | 13.5 | 0.8 (0.7-1.1)  | 13.4 |                |      |                |      |
| 2019/1/21 | 1.5 (1.1-1.8)  | 13.5 | 1.5 (1.3-1.7)  | 9.6  |                |      |                |      |
| 2019/1/22 | 1.3 (1.0-1.5)  | 12.2 | 1.3 (1.1-1.6)  | 12.5 |                |      |                |      |
| 2019/1/23 | 2.5 (2.0-3.0)  | 12.9 | 2.5 (1.8-3.0)  | 15.2 |                |      |                |      |
| Average   |                | 12.5 |                | 13.2 |                |      |                |      |

Table S5 Aerosol water content (AWC,  $\mu\text{g}/\text{m}^3$ ) estimated by ISORROPIA II model using temperature, RH and aerosol-phase ion concentrations

| Lab NO.   | 1    | 2    | 3    | 4    | 5    | 6    | 7    | 8    | 9    | 10   |
|-----------|------|------|------|------|------|------|------|------|------|------|
| 2019/1/16 | 0.93 | 0.78 | 0.80 | 0.40 | 0.92 | 0.80 | 0.85 | 0.96 | 0.83 | 0.89 |
| 2019/1/17 | 1.04 | 0.83 | 0.87 | 0.60 | 1.13 | 1.04 | 0.95 | 0.89 | 0.92 | 1.00 |
| 2019/1/18 | 0.93 | 0.81 | 0.82 | 0.55 | 0.99 | 0.79 | 0.86 | 0.83 | 0.86 | 0.88 |
| 2019/1/19 | 0.31 | 0.24 | 0.24 | 0.23 | 0.27 | 0.19 | 0.28 | 0.24 | 0.30 | 0.31 |
| 2019/1/20 | 0.22 | 0.15 | 0.14 | 0.12 | 0.18 | 0.15 | 0.15 | 0.15 | 0.31 | 0.14 |
| 2019/1/21 | 0.26 | 0.25 | 0.24 | 0.19 | 0.24 | 0.23 | 0.24 | 0.22 | 0.27 | 0.25 |
| 2019/1/22 | 0.61 | 0.46 | 0.49 | 0.38 | 0.46 | 0.53 | 0.52 | 0.50 | 0.58 | 0.54 |
| 2019/1/23 | 3.13 | 2.51 | 2.55 | 1.85 | 2.53 | 2.55 | 2.75 | 2.75 | 2.86 | 2.92 |
