# Supplementary material for: An inter-laboratory comparison of aerosol in organic ion measurements by Ion Chromatography: implications for aerosol pH estimate
Source: Copernicus journal article supplement (doi:10.5194/amt-2020-156), 2020-05-04
Supplement: Supplementary file [file revised Fig. 3.pdf › revised Fig. 3.pdf]

Coefficient of divergence (COD)

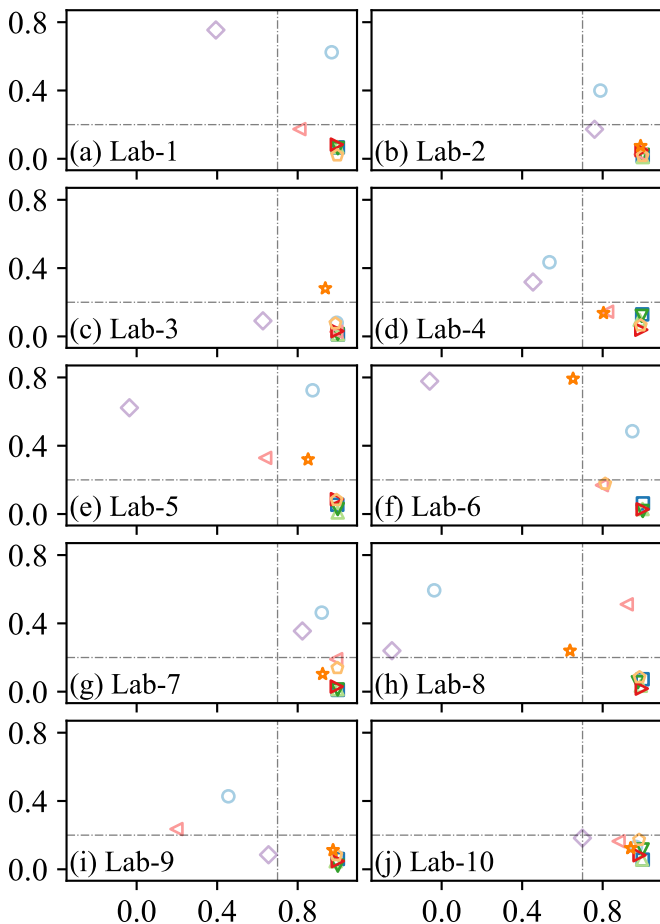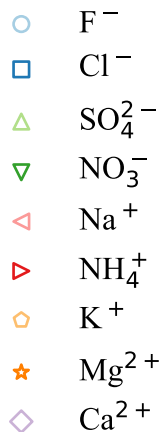

Correlation coefficient (R)
